# Supplementary material for: Activin A marks a novel progenitor cell population during fracture healing and reveals a therapeutic strategy
Source: eLife. 2023 Dec 11;12:e89822. doi: 10.7554/eLife.89822 (PMC10783872; doi:10.7554/eLife.89822)
Supplement: Figure 1—source data 1. [file elife-89822-fig1-data1.xlsx]

## Sheet: Sheet1
Periosteum	Fx
0.965936	3.18215
0.882703	3.01049
0.913831	2.96905
1.04972	1.76541
1	1.95884
1.08673	1.67018
1.05702	3.13834
1.07923	3.53081
1.00696	3.55537
	2.34567
	2.28153
	2.53151
