# Supplementary material for: Activin A marks a novel progenitor cell population during fracture healing and reveals a therapeutic strategy
Source: eLife. 2023 Dec 11;12:e89822. doi: 10.7554/eLife.89822 (PMC10783872; doi:10.7554/eLife.89822)
Supplement: Figure 2—figure supplement 1—source data 1. [file elife-89822-fig2-figsupp1-data1.xlsx]

## Sheet: Sheet1
Total	Td+	Td-
100	80	0
120	100	5
98	110	2
104	105	0
