# Supplementary material for: Activin A marks a novel progenitor cell population during fracture healing and reveals a therapeutic strategy
Source: eLife. 2023 Dec 11;12:e89822. doi: 10.7554/eLife.89822 (PMC10783872; doi:10.7554/eLife.89822)
Supplement: Figure 2—figure supplement 3—source data 1. [file elife-89822-fig2-figsupp3-data1.xlsx]

## Sheet: Sheet1
Day 0	Day 5	Day 10
460000	2500000	4000000
540000	2300000	3800000
510000	2800000	4200000
