# Supplementary material for: Activin A marks a novel progenitor cell population during fracture healing and reveals a therapeutic strategy
Source: eLife. 2023 Dec 11;12:e89822. doi: 10.7554/eLife.89822 (PMC10783872; doi:10.7554/eLife.89822)
Supplement: Figure 2—figure supplement 3—source data 2. [file elife-89822-fig2-figsupp3-data2.xlsx]

## Sheet: Sheet1
	Day 0	Day 5	Day 10
MPC	7906.46	21889.9	11989.7
PPC	2561.25	41590.7	68156.8
EOB	2752.78	10776.5	21812
OB	396.437	3906.5	56489.9
CH	307.35	6028.13	111642
HCH	75.7238	808.241	69909.1
