# Supplementary material for: Activin A marks a novel progenitor cell population during fracture healing and reveals a therapeutic strategy
Source: eLife. 2023 Dec 11;12:e89822. doi: 10.7554/eLife.89822 (PMC10783872; doi:10.7554/eLife.89822)
Supplement: Figure 2—source data 1. [file elife-89822-fig2-data1.xlsx]

## Sheet: Sheet1
	Day 0	Day 5	Day 10
MPC	20.6	38	33.1
PPC	18.4	63.1	46.3
EOB	14.2	45.9	45
OB	16.9	37.1	31.2
CH	20.3	77.7	27
HCH	41.2	70.8	32.7
