# Supplementary material for: Activin A marks a novel progenitor cell population during fracture healing and reveals a therapeutic strategy
Source: eLife. 2023 Dec 11;12:e89822. doi: 10.7554/eLife.89822 (PMC10783872; doi:10.7554/eLife.89822)
Supplement: Figure 3—source data 1. [file elife-89822-fig3-data1.xlsx]

## Sheet: Sheet1
	CD34+					CD34-
Day 0	0.79	0.69	0.77	0.78	0.76	3.32	2.98	3.43	3.98	2.99
Day 5	11.5	10.9	11.9	11.7	11	24.5	27.5	23.9	26.7	24.6
