# Supplementary material for: Activin A marks a novel progenitor cell population during fracture healing and reveals a therapeutic strategy
Source: eLife. 2023 Dec 11;12:e89822. doi: 10.7554/eLife.89822 (PMC10783872; doi:10.7554/eLife.89822)
Supplement: Figure 3—source data 2. [file elife-89822-fig3-data2.xlsx]

## Sheet: MPC
	Col2/Td+ CD34+ (MPC)				Col2/Td+ CD34- (PPC)
Cd34	44.79	39.81	55.14	49.01	1.21	0.77	1.6	0.67
Ly6a	10.67	10.45	9.95	11.2	0.9	1.24	0.78	1.15
Cd248	6.21	6.52	5.8	8.03	1.09	1.09	0.89	0.95
Clec3b	36	31.12	38.59	39.4	0.84	1.2	1.1	0.91

## Sheet: PPC
	Col2/Td+ CD34+ (MPC)				Col2/Td+ CD34- (PPC)
Acta2	0.76	0.49	0.38	0.46	0.83	0.94	1.1	1.16
Tagln	0.68	0.92	0.9	0.8	1.71	1.36	1.82	1.27
Inhba	0.49	0.58	0.33	0.35	0.8	0.94	1.14	1.16
