# Supplementary material for: Activin A marks a novel progenitor cell population during fracture healing and reveals a therapeutic strategy
Source: eLife. 2023 Dec 11;12:e89822. doi: 10.7554/eLife.89822 (PMC10783872; doi:10.7554/eLife.89822)
Supplement: Figure 4—source data 1. [file elife-89822-fig4-data1.xlsx]

## Sheet: Sheet1
	NC				Activin A				nActA.Ab
Day 0	1475	1551	1183	1640	1566	1494	1246	1555	1449	1190	1493	1268	1343	1550
Day 1	2805	2985	2799	2638	3245	3237	3060	2965	2227	2813	2700	2071	2554	1959
Day 2	4786	5128	4438	4351	6026	6286	5577	6597	4095	4567	4492	3776	4656	4495
Day 3	11892	13555	13712	12044	15111	14639	16342	14851	7479	7722	7072	9103	10071	10803
