# Supplementary material for: Activin A marks a novel progenitor cell population during fracture healing and reveals a therapeutic strategy
Source: eLife. 2023 Dec 11;12:e89822. doi: 10.7554/eLife.89822 (PMC10783872; doi:10.7554/eLife.89822)
Supplement: Figure 4—source data 2. [file elife-89822-fig4-data2.xlsx]

## Sheet: Sheet1
	NC			Activin A			TGFβ1
Acta2	1.0595	0.9749	0.9682	2.33	2.19	2	2.77	3.81	3.29
Tagln	0.9054	0.8332	1.3256	2.34	2.28	3.07	3.11	5.19	2.32
