# Supplementary material for: Activin A marks a novel progenitor cell population during fracture healing and reveals a therapeutic strategy
Source: eLife. 2023 Dec 11;12:e89822. doi: 10.7554/eLife.89822 (PMC10783872; doi:10.7554/eLife.89822)
Supplement: Figure 4—source data 3. [file elife-89822-fig4-data3.xlsx]

## Sheet: Sheet1
	NC				ACT				AB
Col2a1	1.20999	0.82645	1.0132	0.9989	1.67018	1.69349	1.9853	2.0143	0.380245	1.20164	0.33543	0.432435
Acan	0.996668	1.27597	1.0143	0.98753	2.51403	2.58471	4.34324	3.45323	0.170164	0.203768	0.15433	0.234553
Sox9	0.976032	1.02456	1.0322	0.98879	1.68673	1.64718	1.4235	1.0423	0.639493	0.861546	0.56783	0.58743
