# Supplementary material for: Activin A marks a novel progenitor cell population during fracture healing and reveals a therapeutic strategy
Source: eLife. 2023 Dec 11;12:e89822. doi: 10.7554/eLife.89822 (PMC10783872; doi:10.7554/eLife.89822)
Supplement: Figure 4—source data 4. [file elife-89822-fig4-data4.xlsx]

## Sheet: Sheet1
	NC				ACT				AB
Bglap2	0.902904	1.15864	1.02	1.002	1.1487	0.97942	1.234	1.0395	0.231647	0.293209	0.1894	0.21042
Sp7	0.861546	1.1607	0.983	1.023	1.29684	1.40932	1.23	1.0233	0.771105	0.474671	0.532	0.235
Runx2	0.907519	1.10191	1.023	1.022	1.29235	1.65737	1.532	1.024	0.510506	0.32932	0.657	0.765
