# Supplementary material for: Activin A marks a novel progenitor cell population during fracture healing and reveals a therapeutic strategy
Source: eLife. 2023 Dec 11;12:e89822. doi: 10.7554/eLife.89822 (PMC10783872; doi:10.7554/eLife.89822)
Supplement: Figure 5—figure supplement 1—source data 1. [file elife-89822-fig5-figsupp1-data1.xlsx]

## Sheet: Callus volume
	Isotype										nActA.AB
7	6.6842	5.944	3.2084	4.3654	4.8136	3.2495					4.9273	4.5755	3.6859	2.1216	2.9797	3.1137
10	22.916	15.3498	18.5927	13.2156							10.2034	12.796	12.095	10.3459
14	11.1181	16.3252	13.9972	13.8669	10.9989	13.7355	15.1559				7.5725	12.2638	9.5521	5.0752	11.0163	8.0708	9.8653	6.383
42	1.8564	2.658	1.68964	2.12357	0	0	0	0	0	0	3.21235	3.22347	0.541	1.045	2.457	1.47	3.23456	2.45	0	0

## Sheet: Bone volume
	Isotype										nActA.AB
7	0.7426	0.4218	0.2804	0.2993	1.4792	0.6492					0.736	0.749	0.6604	0.2585	0.4281	0.6369
10	2.303	2.1348	2.7746	2.5044							1.9426	1.5862	1.5968	1.4895
14	2.3776	4.2124	3.3354	4.8236	3.0991	3.0803	3.5329				1.7497	2.209	1.3027	3.5737	2.1649	3.469	1.6868	3.1711
42	0.785257	1.73036	0.75527	1.14036	0	0	0	0	0	0	1.52587	1.0992	0.292681	0.35948	1.40295	0.54537	2.18009	0.80605	0	0

## Sheet: Bone fraction
	Isotype										nActA.AB
7	0.1111	0.071	0.0874	0.0686	0.3073	0.1998					0.1494	0.1637	0.1792	0.1219	0.1437	0.2046
10	0.1005	0.1881	0.1492	0.1895							0.1904	0.124	0.132	0.144
14	0.2638	0.2138	0.258	0.2383	0.2818	0.2243	0.2331				0.2311	0.2617	0.1671	0.2218	0.2567	0.2981
42	0.423	0.651	0.447	0.537							0.475	0.341	0.541	0.344	0.571	0.371	0.674	0.329
