# Supplementary material for: Activin A marks a novel progenitor cell population during fracture healing and reveals a therapeutic strategy
Source: eLife. 2023 Dec 11;12:e89822. doi: 10.7554/eLife.89822 (PMC10783872; doi:10.7554/eLife.89822)
Supplement: Figure 5—figure supplement 2—source data 1. [file elife-89822-fig5-figsupp2-data1.xlsx]

## Sheet: Bone volume fraction
Isotype	nActA.AB
0.0592	0.0472
0.0582	0.0326
0.0358	0.0706
0.0674	0.0515
0.0444	0.0579
0.0418	0.0546
0.0459	0.0467
0.0489	0.0399

## Sheet: Tb.N
Isotype	nActA.AB
3.8658	3.8223
4.1863	3.6939
3.5895	4.3219
4.579	3.9717
4.0713	3.8644
3.877	3.9789
3.543	3.4348
3.7809	3.306

## Sheet: Tb.Th
Isotype	nActA.AB
0.0299	0.0283
0.0378	0.0359
0.025	0.0292
0.0287	0.038
0.0279	0.0289
0.0368	0.0282
0.032	0.0325
0.0299	0.0322

## Sheet: Tb.Sp
Isotype	nActA.AB
0.2524	0.2559
0.2333	0.2678
0.2746	0.2256
0.2121	0.2459
0.2419	0.2522
0.2531	0.2479
0.2373	0.2457
0.2478	0.2376
