# Supplementary material for: Activin A marks a novel progenitor cell population during fracture healing and reveals a therapeutic strategy
Source: eLife. 2023 Dec 11;12:e89822. doi: 10.7554/eLife.89822 (PMC10783872; doi:10.7554/eLife.89822)
Supplement: Figure 5—figure supplement 2—source data 2. [file elife-89822-fig5-figsupp2-data2.xlsx]

## Sheet: Ps.Pm
Isotype	nActA.AB
5.6553	5.3933
5.3131	5.6167
5.1811	5.6141
5.3232	5.3292
5.6321	5.5682
5.2456	5.1421
5.1135	5.1346
5.3864	5.2234

## Sheet: Ec.Pm
Isotype	nActA.AB
4.3656	4.1392
4.3762	4.113
4.1789	4.3759
4.3633	4.3454
4.2144	4.2642
4.0923	4.0864
4.3455	4.3211
4.3124	4.2346

## Sheet: Ct.Ar
Isotype	nActA.AB
0.745218	0.640917
0.898413	0.850794
0.637159	0.750794
0.818071	0.663316
0.839235	0.776014
0.641921	0.558762
0.816199	0.727337
0.594299	0.687654

## Sheet: Ct.Th
Isotype	nActA.AB
0.13234	0.12631
0.12234	0.11289
0.12546	0.139243
0.09556	0.092654
0.12351	0.12874
0.11246	0.11274
0.129785	0.11923
0.11683	0.09175
