# Supplementary material for: Activin A marks a novel progenitor cell population during fracture healing and reveals a therapeutic strategy
Source: eLife. 2023 Dec 11;12:e89822. doi: 10.7554/eLife.89822 (PMC10783872; doi:10.7554/eLife.89822)
Supplement: Figure 5—source data 1. [file elife-89822-fig5-data1.xlsx]

## Sheet: Callus area
	Isotype							nActA.AB
5	2.55293	2.45845	2.08818	2.58807				1.57358	1.57665	1.48957	1.67593
7	5.12094	4.28114	6.53803	6.21012	5.12094			3.81529	3.3314	3.30447	2.07843	2.88161
10	6.36085	6.37738	7.59547	6.53834	6.81729			5.19925	3.70709	4.60676	5.86598	3.92496
14	6.79161	5.85389	8.7915	6.7418	6.76983	6.86728	7.43247	3.01916	5.00964	2.40579	4.03856	2.49925	3.20105	4.61251	2.85232

## Sheet: Cartilage area
	Isotype							nActA.AB
5	0.130128	0.145221	0.20331	0.132293				0.011825	0.0984961	0.0436237	0.0656013
7	1.56321	1.89443	2.20262	1.99544	1.86445			0.394003	0.533454	0.810561	0.339898	0.794856
10	1.71776	2.74199	4.42878	3.14403	3.76341			2.20624	1.07635	1.94926	1.48616	0.601097
14	1.75423	1.57321	2.44284	1.68642	1.76212	1.43339	1.54353	0.57095	1.32693	0.0249594	0.707245	0.227784	0.0874006	1.2847	0.593191

## Sheet: Bone area
	Isotype							nActA.AB
5	0.198291	0.169229	0.355425	0.32599				0.280369	0.40726	0.227283	0.298893
7	1.15839	1.55276	1.552	1.6037	1.15839			0.487549	0.77	0.952977	0.517958	0.972252
10	2.67533	2.17531	1.93275	2.30827	2.13307			1.44846	1.55356	1.51668	1.30679	1.30969
14	4.6644	3.67486	4.3091	4.06398	3.10817	3.7961	4.07248	2.28438	2.92926	1.4658	2.40968	1.81461	2.13324	2.02588	1.40978
