# Supplementary material for: Activin A marks a novel progenitor cell population during fracture healing and reveals a therapeutic strategy
Source: eLife. 2023 Dec 11;12:e89822. doi: 10.7554/eLife.89822 (PMC10783872; doi:10.7554/eLife.89822)
Supplement: Figure 5—source data 2. [file elife-89822-fig5-data2.xlsx]

## Sheet: Sheet1
Isotype	nActA.AB
7	5
7	4
6	6
7	6
7	5
8	7
7	4
8	6
6	6
6	7
