# Supplementary material for: Activin A marks a novel progenitor cell population during fracture healing and reveals a therapeutic strategy
Source: eLife. 2023 Dec 11;12:e89822. doi: 10.7554/eLife.89822 (PMC10783872; doi:10.7554/eLife.89822)
Supplement: Figure 5—source data 3. [file elife-89822-fig5-data3.xlsx]

## Sheet: Energy to failure
Isotype	nActA.AB
3.16288	1.82534
1.3495	2.21027
5.33748	2.35153
3.93973	1.59346
2.25812	2.40018
3.88842	0.27085
2.6623	0.79638
2.1047	2.49377
1.63224	0.61332
2.88836	1.70799

## Sheet: Stiffness
Isotype	nActA.AB
20.25	12.684
20.844	17.869
25.747	25.295
38.965	10.534
33.96	20.07
32.157	12.307
32.295	17.723
19.744	23.683
21.205	10.9087
15.363	28.321

## Sheet: Peak load
Isotype	nActA.AB
10.6651	7.79453
7.74528	8.80144
9.14779	10.7357
16.7124	5.54204
8.88087	9.51762
11.3324	3.05211
7.69788	5.4385
10.8948	10.4766
8.02755	0.75251
9.14151	9.02237
