# Supplementary material for: Activin A marks a novel progenitor cell population during fracture healing and reveals a therapeutic strategy
Source: eLife. 2023 Dec 11;12:e89822. doi: 10.7554/eLife.89822 (PMC10783872; doi:10.7554/eLife.89822)
Supplement: Figure 5—source data 4. [file elife-89822-fig5-data4.xlsx]

## Sheet: pSmad2
Isotype	nActA.AB
42.1	20.4
37.2	22.5
35.1	24.5

## Sheet: aSMA
Isotype	nActA.AB
50.2	30.7
60.5	41.2
46.6	33.6

## Sheet: pSmad2 in aSMA+
Isotype	nActA.AB
63.2	21.5
58.6	23.1
53.3	20

## Sheet: pSmad2 in aSMA-
Isotype	nActA.AB
18.2	15.1
12	10.3
12.9	16.1
