# Supplementary material for: Activin A marks a novel progenitor cell population during fracture healing and reveals a therapeutic strategy
Source: eLife. 2023 Dec 11;12:e89822. doi: 10.7554/eLife.89822 (PMC10783872; doi:10.7554/eLife.89822)
Supplement: Figure 5—source data 5. [file elife-89822-fig5-data5.xlsx]

## Sheet: Sheet1
	ISO				nACT.AB
Acta2	1.046	1.098	1.121	0.776	0.253	0.29	0.35	0.345
Inhba	0.711	1.019	1.336	1.033	0.411	0.389	0.489	0.492
