# Supplementary material for: Activin A marks a novel progenitor cell population during fracture healing and reveals a therapeutic strategy
Source: eLife. 2023 Dec 11;12:e89822. doi: 10.7554/eLife.89822 (PMC10783872; doi:10.7554/eLife.89822)
Supplement: Figure 6—figure supplement 1—source data 1. [file elife-89822-fig6-figsupp1-data1.xlsx]

## Sheet: 2M callus volume
	Veh										ACT
Day 14	20.6113	19.8537	10.9602	18.5654	17.4081						21.3711	31.1091	30.8705	28.7285	26.2861	27.4938
Day 28	4.5728	9.7074	8.8679	5.5522	6.2336						15.5821	21.2596	8.0576	9.2469	14.4909	10.9853
Day 42	2.82222	4.07169	5.36776	5.11663	3.67993	7.31909	5.30407	9.983	1.98021	2.76327	1.56972	1.60776	3.96799	0.799361	4.72883	1.43606	1.25201	0.86492	0.641723	2.0124

## Sheet: 20M callus volume
	Veh										ACT
Day 14	14.2564	17.0197	15.9801	18.5738							32.724	22.9987	27.2207	37.311
Day 28	6.1967	18.7389	10.4013	9.9714	21.9608	9.2967					15.9878	26.8021	17.8962	26.7777	20.7015	16.5719
Day 42	7.36583	4.89152	7.69948	10.4306	6.51449	10.8568	6.54318	6.41985	9.39419	10.6491	5.34512	4.36489	4.8096	8.98252	6.92958	6.62032	5.70041	5.21758	4.1291

## Sheet: 2M bone volume
	Matrigel										ACT
Day 14	4.3106	3.7276	4.0974	6.7654	4.6795						6.0292	8.2862	9.5133	6.9185	5.7747	5.9344
Day 28	2.7734	5.0645	3.0146	1.644	2.3752						7.2006	6.1501	4.3237	4.2404	5.5014	2.8313
Day 42	1.54782	1.64634	1.8324	1.3151	1.28945	1.43012	2.3976	3.41922	1.19046	1.56615	0.761865	0.794139	2.35217	0.487655	2.52455	0.709183	0.646057	0.498668	0.337229	1.19178

## Sheet: 20M bone volume
	Matrigel										ACT
Day 14	1.3848	1.9177	2.0153	1.972							3.8847	2.8943	2.6498	2.7796
Day 28	0.729	3.4988	2.5308	2.67	2.2845	2.5731					3.8976	4.144	3.3523	7.6801	6.502	6.317
Day 42	3.32664	1.90654	2.21783	4.59536	1.53619	2.48969	1.8382	2.48764	4.01196	3.78	1.70406	1.6609	1.69646	4.47049	2.99783	2.98297	2.80503	2.6359	1.9449

## Sheet: 2M bone fraction
	Matrigel										ACT
Day 14	0.2091	0.1878	0.2738	0.2644	0.2688						0.1885	0.1621	0.187	0.2408	0.2197	0.2158
Day 28	0.6065	0.5217	0.34	0.2961	0.381						0.4621	0.2893	0.5366	0.4586	0.3796	0.2577
Day42	0.5484	0.4043	0.3414	0.257	0.3504	0.1954	0.452	0.3425	0.6012	0.5668	0.4854	0.4939	0.5928	0.6101	0.5339	0.4938	0.516	0.5765	0.5255	0.5922

## Sheet: 20M bone fraction
	Matrigel										ACT
Day 14	0.0971	0.1714	0.1261	0.1062							0.1187	0.0824	0.0973	0.0745
Day 28	0.1176	0.1867	0.2433	0.2678	0.104	0.2768					0.2438	0.1546	0.1873	0.2868	0.3141	0.3812
Day 42	0.451631	0.389764	0.288049	0.440566	0.235811	0.229321	0.280934	0.387492	0.427068	0.354959	0.318807	0.380514	0.352724	0.497688	0.432614	0.450578	0.492075	0.505196	0.471023
