# Supplementary material for: Activin A marks a novel progenitor cell population during fracture healing and reveals a therapeutic strategy
Source: eLife. 2023 Dec 11;12:e89822. doi: 10.7554/eLife.89822 (PMC10783872; doi:10.7554/eLife.89822)
Supplement: Figure 6—source data 1. [file elife-89822-fig6-data1.xlsx]

## Sheet: Callus area
2M											20M
	Veh					ACT					Veh					ACT
Day 5	1.97214	2.42558	1.68773	1.61505		3.88456	4.49474	2.52372	2.34447		1.06577	0.653016	1.04241	0.845436	0.643034	2.06628	1.83707	1.18222	1.67462	1.32746
Day 14	6.26722	5.79275	5.73385	7.70998	4.8586	10.4559	9.15828	8.90707	9.57288	9.80503	5.26213	3.87323	4.43982	4.51533		11.0272	9.25143	10.7516	9.43509
Day 28	2.27818	1.89374	2.0757	1.79259	2.01092	3.07328	2.48629	2.52829	3.08266	3.25231	4.48013	4.51566	5.08866	3.86763		8.49861	7.36498	6.49012	7.13892

## Sheet: Cartilage area
2M											20M
	Veh					ACT					Veh					ACT
Day 5	0.475026	0.324775	0.380384	0.30318		1.3247	0.624129	0.61527	0.865103		0.0868605	0.0179271	0.0283344	0.0234543	0.013943	0.309028	0.119798	0.204301	0.184969	0.15746
Day 14	2.33794	2.43246	2.14482	1.54632	1.43901	2.54898	2.41278	3.54761	2.60432	2.52884	1.66096	1.29293	1.44321	1.67676		4.32988	3.80656	3.74926	1.80981
Day 28	0	0	0	0	0	0	0	0	0	0	0	0	0	0	0	0	0	0	0	0

## Sheet: Bone area
2M											20M
	Veh					ACT					Veh					ACT
Day 5	0.289191	0.495465	0.278023	0.343502		0.520277	1.0556	0.588791	0.496385		0.0800937	0.0288555	0.0962728	0.0762322	0.0238952	0.188561	0.486612	0.22031	0.217858	0.15446
Day 14	2.85838	1.91084	3.42975	2.92611	3.66476	3.61838	5.2619	4.16461	5.08475	5.44439	1.6083	2.36287	0.87573	1.63793		3.57495	2.54678	2.70373	3.05283
Day 28	2.27818	1.89374	2.0757	1.79259	2.01092	3.07328	2.48629	2.52829	3.08266	3.25231	4.48013	4.51566	5.08866	3.86763		8.49861	7.36498	6.49012	7.13892
