# Supplementary material for: Activin A marks a novel progenitor cell population during fracture healing and reveals a therapeutic strategy
Source: eLife. 2023 Dec 11;12:e89822. doi: 10.7554/eLife.89822 (PMC10783872; doi:10.7554/eLife.89822)
Supplement: Figure 6—source data 2. [file elife-89822-fig6-data2.xlsx]

## Sheet: pSmad2
	Veh			Act
pSmad2	48.4	40.4	36.9	81.2	67.6	71.5

## Sheet: aSMA
	Veh			Act
αSMA	44.44	51.88	47.27	61.03	72.39	67.51

## Sheet: pSmad2 in aSMA+
Veh	Act
53.8	71
46.5	69
54.2	67.5

## Sheet: pSmad2 in aSMA-
Veh	Act
13.3	18.2
10.5	15.8
16.6	20
