# Supplementary material for: Activin A marks a novel progenitor cell population during fracture healing and reveals a therapeutic strategy
Source: eLife. 2023 Dec 11;12:e89822. doi: 10.7554/eLife.89822 (PMC10783872; doi:10.7554/eLife.89822)
Supplement: Figure 6—source data 3. [file elife-89822-fig6-data3.xlsx]

## Sheet: 2M
Veh	ACT
7	7
6	8
6	7
6	7
8	7
7	7
6	7
6	8
6	8
7	7

## Sheet: 20M
Veh	Act
6	7
6	7
5	7
6	7
7	6
6	7
7	6
5	7
7	7
6
