# Supplementary material for: Activin A marks a novel progenitor cell population during fracture healing and reveals a therapeutic strategy
Source: eLife. 2023 Dec 11;12:e89822. doi: 10.7554/eLife.89822 (PMC10783872; doi:10.7554/eLife.89822)
Supplement: Figure 6—source data 4. [file elife-89822-fig6-data4.xlsx]

## Sheet: 2M Energy to Failure
Veh	ACT
2.41168	4.71988
1.36359	5.46776
3.13368	5.33963
2.17161	3.41844
1.60853	1.69145
1.58938	3.19484
0.696063	2.15873
1.39519	5.57214
4.21214	3.58797
6.82215	3.71207

## Sheet: 20M Energy to Failure
Veh	Act
2.17489	1.77521
2.17355	2.47598
2.29404	2.14053
1.808	3.36222
2.1695	1.89701
0.970642	3.72438
1.97792	2.50501
2.00464	5.00785
1.6924	2.55673
3.07406	2.3947

## Sheet: 2M Stiffness
Veh	ACT
13.6164	20.3343
26.1172	11.8615
34.9357	27.4645
35.1561	35.1215
46.4095	11.7842
39.5884	37.6869
34.2417	15.679
8.96103	10.0786
20.281	13.6157
17.8674	28.6213

## Sheet: 20M Stiffness
Veh	Act
10.039	14.515
9.69	5.631
4.1319	9.2417
4.2144	13.896
8.5151	11.916
8.12	19.875
6.7543	14.274
5.1776	9.09
10.531	23
6.4054	8.2239

## Sheet: 2M Peak load
Veh	ACT
9.23322	16.5981
7.54511	10.2291
14.2663	10.2031
13.08	10.4505
11.2702	4.04255
7.94778	13.66
6.04968	8.87252
5.38528	10.6777
8.81884	9.96995
16.1556	6.39746

## Sheet: 20M Peak load
Veh	Act
4.87626	7.8826
4.86718	5.2005
3.25024	6.92568
3.74746	8.86571
8.94999	5.92847
4.90653	12.6915
8.12125	6.84507
4.59361	10.3763
5.55098	9.2262
8.12352	4.96042
