# Supplementary material for: Activin A marks a novel progenitor cell population during fracture healing and reveals a therapeutic strategy
Source: eLife. 2023 Dec 11;12:e89822. doi: 10.7554/eLife.89822 (PMC10783872; doi:10.7554/eLife.89822)
Supplement: Figure 7—source data 2. [file elife-89822-fig7-data2.xlsx]

## Sheet: Day 7
	Veh						ACT
Intramedulla	0.144	0.1457	0.128	0.1301			0.1847	0.2079	0.1657	0.193
Defect	0.035	0.068	0.031	0.034			0.065	0.064	0.087	0.098

## Sheet: Day 21
	Veh						ACT
Intramedulla	0.0256023	0.0780784	0.0247197	0.0182232	0.0369724	0.0628502	0.0797936	0.0749245	0.0854041	0.05761	0.0623252	0.0544173
defect	0.689818	0.626155	0.562612	0.599024	0.649955	0.5804	0.712502	0.926428	0.731599	0.822952	0.749027	0.802652
